# Supplementary material
Source: MDPI journal article supplement (https://www.mdpi.com/search?q=vaccines-07-00129)
Supplement: s001 [file vaccines-07-00129-s001.pdf]

Review

# Impact of Maternal Immunity on Congenital Cytomegalovirus Birth Prevalence and Infant Outcomes: A Systematic Review

Tiziana Coppola, Jesse F. Mangold, Sarah Cantrell and Sallie R. Permar

Supplementary Materials: Search strategies for cCMV transmission in seropositive maternal populations.

MEDLINE (via PubMed)

Search date: 10/9/2018

|    |                                                                                                                                                                                                                                                                                                                                                                                                                                                                                                                                                                                                                                                                                                                                                                                                                                                                                                                  |           |
|----|------------------------------------------------------------------------------------------------------------------------------------------------------------------------------------------------------------------------------------------------------------------------------------------------------------------------------------------------------------------------------------------------------------------------------------------------------------------------------------------------------------------------------------------------------------------------------------------------------------------------------------------------------------------------------------------------------------------------------------------------------------------------------------------------------------------------------------------------------------------------------------------------------------------|-----------|
| #1 | "cytomegalovirus infections"[Mesh] OR "cytomegalovirus vaccines"[Mesh] OR "cytomegalovirus"[Mesh] OR "cytomegalovirus-specific hyperimmune globulin"[supplementary concept] OR cytomegalovirus[tw] OR cytomegalic[tw] OR "cmv infection"[tw] OR "cmv infections"[tw] OR "ccmv infection"[tw] OR "ccmv infections"[tw] OR "cmv disease"[tw] OR "ccmv disease"[tw]                                                                                                                                                                                                                                                                                                                                                                                                                                                                                                                                                 | 48,102    |
| #2 | "Seroconversion"[Mesh] OR seroconversion[tw] OR seroprevalence[tw] OR "sero-positive"[tw] OR seropositive[tw] OR seropositivity[tw]                                                                                                                                                                                                                                                                                                                                                                                                                                                                                                                                                                                                                                                                                                                                                                              | 76,463    |
| #3 | "congenital"[sh] OR congenital[tw]                                                                                                                                                                                                                                                                                                                                                                                                                                                                                                                                                                                                                                                                                                                                                                                                                                                                               | 327,361   |
| #4 | #1 AND #2 AND #3                                                                                                                                                                                                                                                                                                                                                                                                                                                                                                                                                                                                                                                                                                                                                                                                                                                                                                 | 308       |
| #5 | ("Child"[Mesh] OR "Infant"[Mesh] OR "Adolescent"[Mesh] OR "Pediatrics"[Mesh] OR Infant[tw] OR infants[tw] OR infancy[tw] OR newborn[tw] OR newborns[tw] OR neonatal[tw] OR neonate[tw] OR neonates[tw] OR baby[tw] OR babies[tw] OR preterm[tw] OR prematurity[tw] OR toddler[tw] OR toddlers[tw] OR boy[tw] OR boys[tw] OR boyhood[tw] OR girl[tw] OR girls[tw] OR girlhood[tw] OR kid[tw] OR kids[tw] OR child[tw] OR children[tw] OR schoolchild[tw] OR school child[tw] OR school age[tw] OR adolescent[tw] OR adolescents[tw] OR adolescence[tw] OR juvenile[tw] OR juveniles[tw] OR youth[tw] OR youths[tw] OR teen[tw] OR teens[tw] OR teenager[tw] OR teenagers[tw] OR pubescent[tw] OR pubescence[tw] OR prepubescent[tw] OR prepubescence[tw] OR pediatric[tw] OR pediatrics[tw] OR paediatric[tw] OR paediatrics[tw]) NOT ("Adult"[Mesh] NOT ("Adolescent"[Mesh] OR "Child"[Mesh] OR "Infant"[Mesh])) | 3,929,935 |
| #6 | #4 AND #5                                                                                                                                                                                                                                                                                                                                                                                                                                                                                                                                                                                                                                                                                                                                                                                                                                                                                                        | 239       |
| #7 | #6 NOT (Editorial[pt] OR Letter[pt] OR Comment[pt])                                                                                                                                                                                                                                                                                                                                                                                                                                                                                                                                                                                                                                                                                                                                                                                                                                                              | 237       |
| #8 | #7 NOT (animals[mh] NOT humans[mh])                                                                                                                                                                                                                                                                                                                                                                                                                                                                                                                                                                                                                                                                                                                                                                                                                                                                              | 235       |
| #9 | #8 AND English[lang]                                                                                                                                                                                                                                                                                                                                                                                                                                                                                                                                                                                                                                                                                                                                                                                                                                                                                             | 218       |

EMBASE

Search date: 10/9/2018

|    |                                                                                                                                                                                                                                                                                                                                                          |        |
|----|----------------------------------------------------------------------------------------------------------------------------------------------------------------------------------------------------------------------------------------------------------------------------------------------------------------------------------------------------------|--------|
| #1 | 'cytomegalovirus infection'/exp OR 'Cytomegalovirus'/exp OR 'Cytomegalovirus antibody'/exp OR 'Cytomegalovirus vaccine'/exp OR cytomegalovirus:ab,ti,kw OR cytomegalic:ab,ti,kw OR 'cmv infection':ab,ti,kw OR 'cmv infections':ab,ti,kw OR 'ccmv infection':ab,ti,kw OR 'ccmv infections':ab,ti,kw OR 'cmv disease':ab,ti,kw OR 'ccmv disease':ab,ti,kw | 73,988 |
|----|----------------------------------------------------------------------------------------------------------------------------------------------------------------------------------------------------------------------------------------------------------------------------------------------------------------------------------------------------------|--------|

|    |                                                                                                                                                                                                                                                                                                                                                                                                                                                                                                                                                                                                                                                                                                                                                                                                                                                                                                                                                                                                                                               |           |
|----|-----------------------------------------------------------------------------------------------------------------------------------------------------------------------------------------------------------------------------------------------------------------------------------------------------------------------------------------------------------------------------------------------------------------------------------------------------------------------------------------------------------------------------------------------------------------------------------------------------------------------------------------------------------------------------------------------------------------------------------------------------------------------------------------------------------------------------------------------------------------------------------------------------------------------------------------------------------------------------------------------------------------------------------------------|-----------|
| #2 | 'seroconversion'/exp OR seroconversion:ab,ti,kw OR seroprevalence:ab,ti,kw OR 'sero-positive':ab,ti,kw OR seropositive:ab,ti,kw OR seropositivity:ab,ti,kw                                                                                                                                                                                                                                                                                                                                                                                                                                                                                                                                                                                                                                                                                                                                                                                                                                                                                    | 80,604    |
| #3 | congenital:ab,ti,kw                                                                                                                                                                                                                                                                                                                                                                                                                                                                                                                                                                                                                                                                                                                                                                                                                                                                                                                                                                                                                           | 330,027   |
| #4 | #1 AND #2 AND #3                                                                                                                                                                                                                                                                                                                                                                                                                                                                                                                                                                                                                                                                                                                                                                                                                                                                                                                                                                                                                              | 433       |
| #5 | ('child'/exp OR 'adolescent'/exp OR 'pediatrics'/exp OR [child]/lim OR [infant]/lim OR [adolescent]/lim OR child:ab,kw,ti OR infant:ab,kw,ti OR infants:ab,ti,kw OR infancy:ab,ti,kw OR infantile:ab,ti,kw OR newborn:ab,ti,kw OR newborns:ab,ti,kw OR neonate:ab,ti,kw OR neonates:ab,ti,kw OR neonatal:ab,ti,kw OR baby:ab,ti,kw OR babies:ab,ti,kw OR preterm:ab,ti,kw OR premature:ab,ti,kw OR prematurity:ab,ti,kw OR toddler:ab,ti,kw OR toddlers:ab,ti,kw OR children:ab,ti,kw OR childhood:ab,ti,kw OR kid:ab,ti,kw OR kids:ab,ti,kw OR schoolchildren:ab,ti,kw OR schoolchild:ab,ti,kw OR preadolescent:ab,ti,kw OR adolescent:ab,ti,kw OR adolescence:ab,ti,kw OR youth:ab,ti,kw OR youths:ab,ti,kw OR teen:ab,ti,kw OR teenager:ab,ti,kw OR teens:ab,ti,kw OR teenagers:ab,ti,kw OR teenage:ab,ti,kw OR teenaged:ab,ti,kw) NOT (([young adult]/lim OR [adult]/lim OR [middle aged]/lim OR [aged]/lim OR [very elderly]/lim) NOT ([embryo]/lim OR [fetus]/lim OR [newborn]/lim OR [infant]/lim OR [child]/lim OR [adolescent]/lim)) | 4,126,897 |
| #6 | #4 AND #5                                                                                                                                                                                                                                                                                                                                                                                                                                                                                                                                                                                                                                                                                                                                                                                                                                                                                                                                                                                                                                     | 313       |
| #7 | #6 NOT ('editorial'/exp OR 'letter'/exp OR 'note'/exp OR [conference abstract]/lim)                                                                                                                                                                                                                                                                                                                                                                                                                                                                                                                                                                                                                                                                                                                                                                                                                                                                                                                                                           | 269       |
| #8 | #7 AND [humans]/lim                                                                                                                                                                                                                                                                                                                                                                                                                                                                                                                                                                                                                                                                                                                                                                                                                                                                                                                                                                                                                           | 249       |
| #9 | #8 AND [english]/lim                                                                                                                                                                                                                                                                                                                                                                                                                                                                                                                                                                                                                                                                                                                                                                                                                                                                                                                                                                                                                          | 222       |

## CINAHL

Search date: 10/9/2018

|    |                                                                                                                                                                                                                                                                                                                                                                                                                                                                                                                                                                                                                                                                                                                                                                                                                                                                                                                                                                                                                      |         |
|----|----------------------------------------------------------------------------------------------------------------------------------------------------------------------------------------------------------------------------------------------------------------------------------------------------------------------------------------------------------------------------------------------------------------------------------------------------------------------------------------------------------------------------------------------------------------------------------------------------------------------------------------------------------------------------------------------------------------------------------------------------------------------------------------------------------------------------------------------------------------------------------------------------------------------------------------------------------------------------------------------------------------------|---------|
| #1 | (MH "Cytomegalovirus Infections+") OR (MH "Cytomegaloviruses") OR "cytomegalovirus infection" OR TI(cytomegalovirus OR cytomegalic OR "cmv infection" OR "cmv infections" OR "ccmv infection" OR "ccmv infections" OR "cmv disease" OR "ccmv disease") OR AB(cytomegalovirus OR cytomegalic OR "cmv infection" OR "cmv infections" OR "ccmv infection" OR "ccmv infections" OR "cmv disease" OR "ccmv disease")                                                                                                                                                                                                                                                                                                                                                                                                                                                                                                                                                                                                      | 3,996   |
| #2 | (MH "Seroconversion") OR TI(seroconversion OR seroprevalence OR "sero-positive" OR seropositive OR seropositivity) OR AB(seroconversion OR seroprevalence OR "sero-positive" OR seropositive OR seropositivity)                                                                                                                                                                                                                                                                                                                                                                                                                                                                                                                                                                                                                                                                                                                                                                                                      | 6,996   |
| #3 | TI(congenital) OR AB(congenital)                                                                                                                                                                                                                                                                                                                                                                                                                                                                                                                                                                                                                                                                                                                                                                                                                                                                                                                                                                                     | 28,402  |
| #4 | #1 AND #2 AND #3                                                                                                                                                                                                                                                                                                                                                                                                                                                                                                                                                                                                                                                                                                                                                                                                                                                                                                                                                                                                     | 48      |
| #5 | MH "Adolescence+" OR MH "Child+" OR MH "Pediatrics+" OR TI(Infant OR infants OR infancy OR newborn OR newborns OR neonatal OR neonate OR baby OR babies OR preterm OR toddler OR toddlers OR boy OR boys OR boyhood OR girl OR girls OR girlhood OR kid OR kids OR child OR children OR schoolchild OR school child OR school age OR adolescent OR adolescents OR adolescence OR juvenile OR juveniles OR youth OR youths OR teen OR teens OR teenager OR teenagers OR pubescent OR pubescence OR prepubescent OR prepubescence OR pediatric OR pediatrics OR paediatric OR paediatrics) OR AB(Infant OR infants OR infancy OR newborn OR newborns OR neonatal OR neonate OR baby OR babies OR preterm OR toddler OR toddlers OR boy OR boys OR boyhood OR girl OR girls OR girlhood OR kid OR kids OR child OR children OR schoolchild OR school child OR school age OR adolescent OR adolescents OR adolescence OR juvenile OR juveniles OR youth OR youths OR teen OR teens OR teenager OR teenagers OR pubescent | 994,180 |

|    |                                                                                                                                                                              |    |
|----|------------------------------------------------------------------------------------------------------------------------------------------------------------------------------|----|
|    | OR pubescence OR prepubescent OR prepubescence OR pediatric OR pediatrics OR paediatric OR paediatrics)                                                                      |    |
| #6 | #4 AND #5                                                                                                                                                                    | 45 |
| #7 | #6 NOT PT ( Abstract OR Book OR Book Chapter OR Book Review OR Case Study OR Commentary OR Editorial OR Letter OR Masters Thesis OR Pamphlet OR Pamphlet Chapter OR Poetry ) | 43 |
| #8 | #7 AND LA English                                                                                                                                                            | 43 |

### Scopus

Search date: 10/9/2018

|    |                                                                                                                                                                                                                                                                                                                                                                                                                                                                                                                                                |           |
|----|------------------------------------------------------------------------------------------------------------------------------------------------------------------------------------------------------------------------------------------------------------------------------------------------------------------------------------------------------------------------------------------------------------------------------------------------------------------------------------------------------------------------------------------------|-----------|
| #1 | TITLE-ABS-KEY ( cytomegalovirus OR cytomegalic OR "cmv infection" OR "cmv infections" OR "ccmv infection" OR "ccmv infections" OR "cmv disease" OR "ccmv disease" )                                                                                                                                                                                                                                                                                                                                                                            | 69,023    |
| #2 | TITLE-ABS-KEY ( seroconversion OR seroprevalence OR "sero-positive" OR seropositive OR seropositivity )                                                                                                                                                                                                                                                                                                                                                                                                                                        | 94,190    |
| #3 | TITLE-ABS-KEY ( congenital )                                                                                                                                                                                                                                                                                                                                                                                                                                                                                                                   | 497,054   |
| #4 | #1 AND #2 AND #3                                                                                                                                                                                                                                                                                                                                                                                                                                                                                                                               | 457       |
| #5 | TITLE-ABS-KEY ( Infant OR infants OR infancy OR newborn OR newborns OR neonatal OR neonate OR baby OR babies OR preterm OR toddler OR toddlers OR boy OR boys OR boyhood OR girl OR girls OR girlhood OR kid OR kids OR child OR children OR schoolchild OR school child OR school age OR adolescent OR adolescents OR adolescence OR juvenile OR juveniles OR youth OR youths OR teen OR teens OR teenager OR teenagers OR pubescent OR pubescence OR prepubescent OR prepubescence OR pediatric OR pediatrics OR paediatric OR paediatrics ) | 1,735,772 |
| #6 | #4 AND #5                                                                                                                                                                                                                                                                                                                                                                                                                                                                                                                                      | 117       |
| #7 | #6 AND ( LIMIT-TO ( DOCTYPE , "ar" ) OR LIMIT-TO ( DOCTYPE , "re" ) )                                                                                                                                                                                                                                                                                                                                                                                                                                                                          | 114       |
| #8 | #7 AND ( LIMIT-TO ( LANGUAGE , "English" ) )                                                                                                                                                                                                                                                                                                                                                                                                                                                                                                   | 106       |

### ClinicalTrials.gov

Search Date:

|    |                                                                                                                                                                                                                                                 |    |
|----|-------------------------------------------------------------------------------------------------------------------------------------------------------------------------------------------------------------------------------------------------|----|
| #1 | (cytomegalovirus OR cytomegalic OR "cmv infection" OR "cmv infections" OR "ccmv infection" OR "ccmv infections" OR "cmv disease" OR "ccmv disease") AND (seroconversion OR seroprevalence OR "sero-positive" OR seropositive OR seropositivity) | 56 |
| #2 | #1 Limit to Child birth-17                                                                                                                                                                                                                      | 20 |
